# Supplementary material for: Brief communication: The Lahaina Fire disaster: How models can be used to understand and predict wildfires
Source: Copernicus journal article supplement (doi:10.5194/nhess-2023-164), 2023-09-20
Supplement: Supplementary file [file nhess-2023-164-AC1-supplement.pdf]

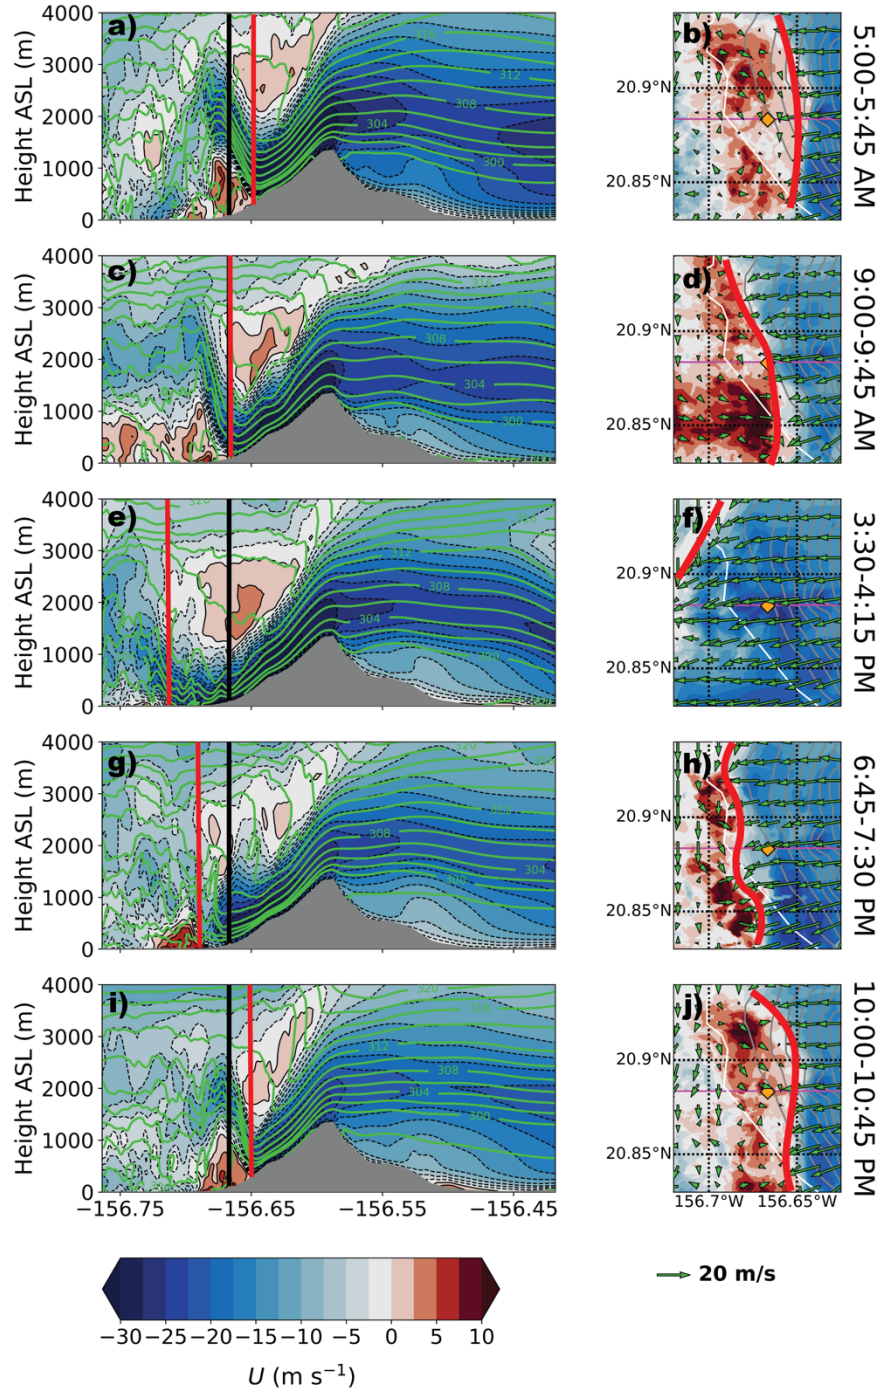

Figure 1: WRF-LES results showing the  $U$ -wind component at various times during the event. (a,c,e,g, and i) Vertical cross-sections slicing east-west through Lahaina (along  $\sim 20.88$  N). Color-filled contours show the  $U$ -wind according to the colorbar, and green contours show the potential temperature. The terrain is color filled in gray, and the approximate location of the fire ignition ( $-156.667$  W) is shown by the vertical black line. (b,d,f,h, and j) X-Y plan views of the  $U$ -wind (color-filled according to the same colorbar) and wind vectors (speed according to the key) at 10 m ASL. The white line marks the coastline, while the gray contours show the elevation at 100 m intervals. The approximate location of the fire ignition ( $20.883$  N,  $-156.667$  W) is shown by the orange diamond, and the magenta line shows the cross-section location. The approximate location of the hydraulic jump and flow reversal in all panels is shown with a red line. All fields are time-averaged according to the displayed time periods.
