# Supplementary material for: Brief communication: The Lahaina Fire disaster: How models can be used to understand and predict wildfires
Source: Copernicus journal article supplement (doi:10.5194/nhess-2023-164), 2023-09-20
Supplement: Supplementary file [file nhess-2023-164-AC2-supplement.pdf]

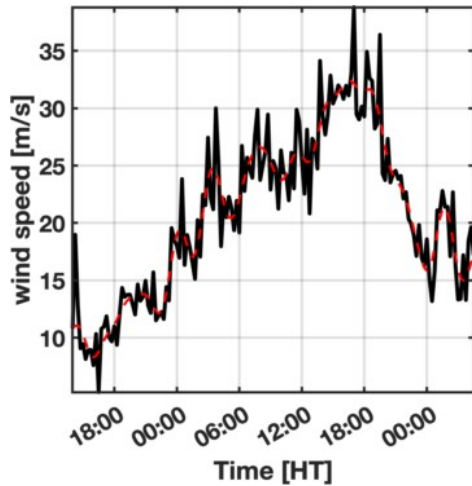

Figure R1: Time series of the maximum 10-meter winds within a box over the Lahaina domain

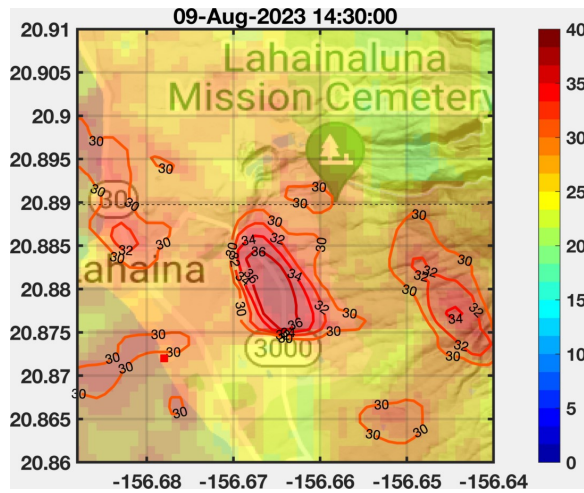

Figure R2: Plan view of 10-meter wind speeds over the town of Lahaina over the duration of the simulation (culminating at 14:30 UTC)

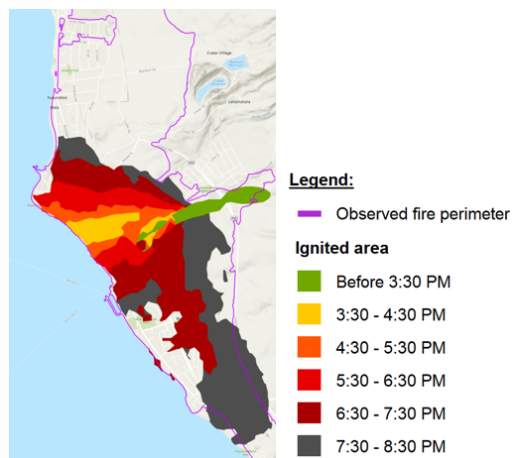

Figure 3: Fire perimeters from SWUIFT simulation at 1-hour intervals compared against the observed final fire perimeter
